# Supplementary figures and images for: Characteristic, Electrical and Optical Properties of Potassium Borate (KB5O8·4H2O) Hydrothermally Synthesised from Different Boron Sources
Source: Research Square preprint supplement (doi:10.21203/rs.3.rs-312150/v1), 2021-03-17

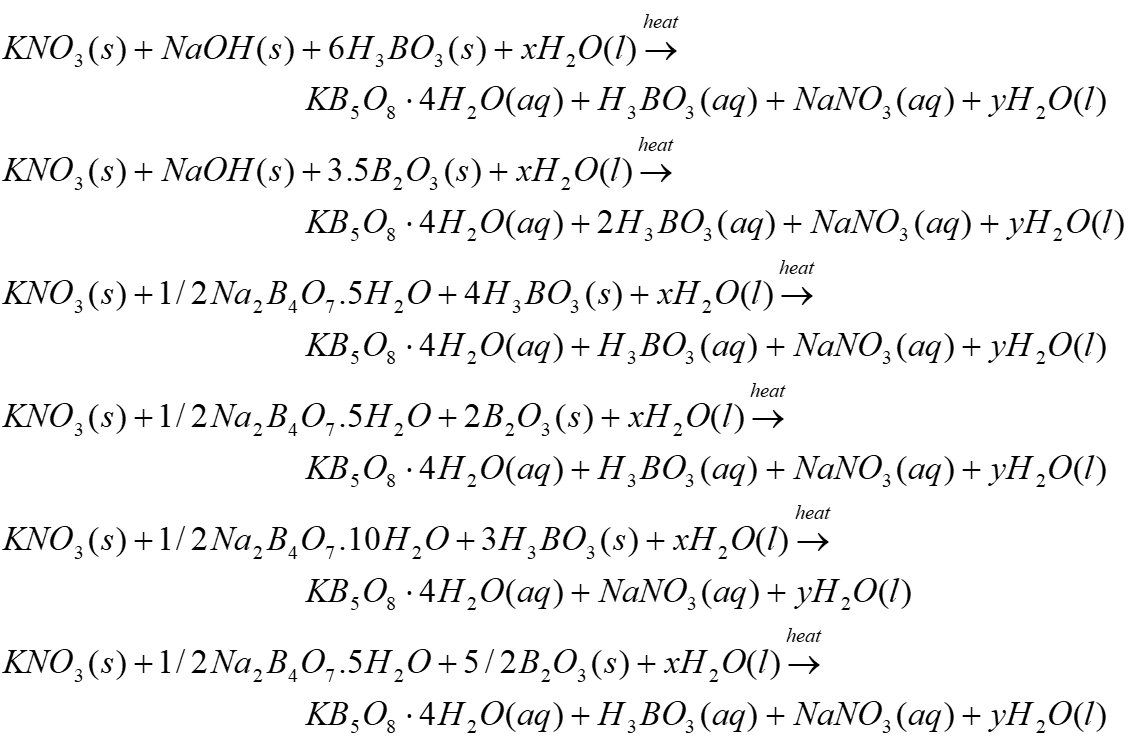

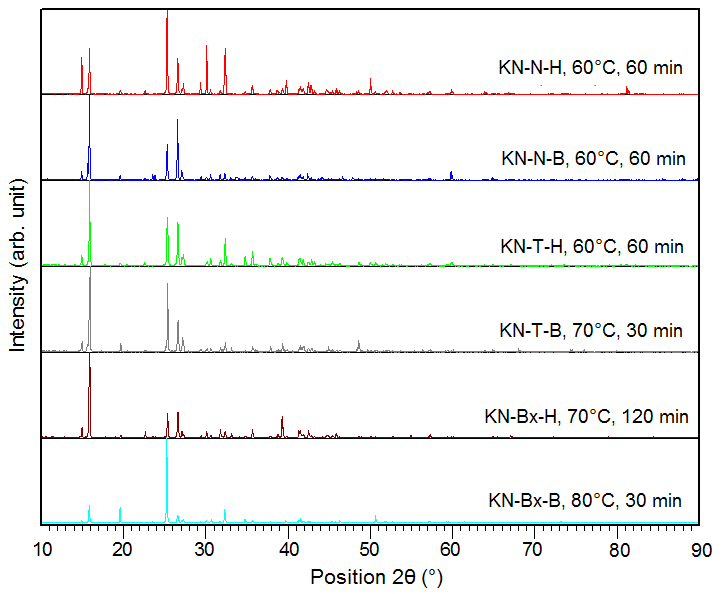

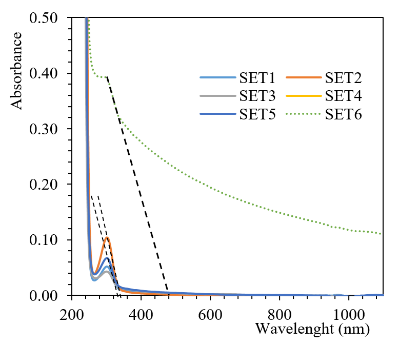

Supplement: Supplementary file 1 [file a53e5d3871bf64072775a565.docx]
